**S2 table: Review of the principles or content of the main communication protocols and methods**

| Communication protocols and methods | Principles or content                                                                                                                                                                                                                                                                                                                                                                                                                                                                                                                                             |
|-------------------------------------|-------------------------------------------------------------------------------------------------------------------------------------------------------------------------------------------------------------------------------------------------------------------------------------------------------------------------------------------------------------------------------------------------------------------------------------------------------------------------------------------------------------------------------------------------------------------|
| ADAPT                               | The ADAPT method was designed to provide a talking map in discussing prognosis. This method proposes a series of signposts that may not all be applicable to a particular patient: 1) <b>A</b> sk what the patient knows, what they want to know; 2) <b>D</b> iscover what info about the future would be useful for the patient; 3) <b>A</b> nticipate ambivalence; 4) <b>P</b> rovide information in the form the patient wants; 5) <b>T</b> rack emotion.                                                                                                      |
| CONNECT                             | The CONNECT protocol was designed to organize the key aspects of remote communication: <b>C</b> ontext; <b>O</b> rganization; <b>N</b> ear and <b>N</b> iceties; <b>E</b> motions; <b>C</b> ounseling; <b>T</b> aking care.                                                                                                                                                                                                                                                                                                                                       |
| NURSE                               | The NURSE method illustrates a number of communicative strategies for responding to emotions. The strategies can be used either individually or in combination: 1) <b>N</b> aming; 2) <b>U</b> nderstanding; 3) <b>R</b> especting; 4) <b>S</b> upporting; 5) <b>E</b> xploring.                                                                                                                                                                                                                                                                                  |
| PREPARED                            | The PREPARED method was designed for communicating prognosis and end-of-life issues with adults in the advanced stages of a life-limiting illness and their caregivers. This method has eight components: 1) <b>P</b> repare for the discussion; 2) <b>R</b> elate to the person; 3) <b>E</b> licit patient and caregiver preferences; 4) <b>P</b> rovide information tailored to needs of patients and / or their families; 5) <b>A</b> cknowledge emotions and concerns; 6) <b>F</b> oster realistic hope; 7) <b>E</b> ncourage questions; 8) <b>D</b> ocument. |
| REMAP                               | The REMAP tool was designed to provide guidance in addressing goals of care through a complex conversation. This method has stages but not all could apply to a particular patient: 1) <b>R</b> eframe why the status quo isn't working; 2) <b>E</b> xpect emotion and empathize; 3) <b>M</b> ap the future; 4) <b>A</b> lign with the patient's values; 5) <b>P</b> lan medical treatments that match patient values; <b>EXTRA</b> - Expect questions about other treatment; <b>EXTRA</b> - Talk about services that would help before introducing hospice.      |
| SPIKES                              | The SPIKES protocol consists of six steps for disclosing unfavorable information: 1) <b>S</b> etting up the context; 2) assessing the patient's <b>P</b> erception; 3) obtaining the patient's <b>I</b> nvitation; 4) giving <b>K</b> nowledge and information to the patient; 5) addressing the patient's <b>E</b> motions with empathic responses; and 6) eliciting the patient's collaboration in <b>S</b> ummarizing the meeting and developing a <b>S</b> trategy or clear plan for the future.                                                              |
| TUVERI                              | The Tuveri method is similar to SPIKES, but is more practical because it reports examples of questions and sequences of actions can be used in a complementary way to the former. This method involves: <ul style="list-style-type: none"> <li>• introducing oneself;</li> <li>• considering having other people participate in the meeting;</li> <li>• being clear about the objective of giving the information (diagnosis, prognosis, treatment plan);</li> </ul>                                                                                              |

|  |                                                                                                                                                                                                                                                                                                                                                                                                                                                                                                                                                                                                                                                                                                                                                                      |
|--|----------------------------------------------------------------------------------------------------------------------------------------------------------------------------------------------------------------------------------------------------------------------------------------------------------------------------------------------------------------------------------------------------------------------------------------------------------------------------------------------------------------------------------------------------------------------------------------------------------------------------------------------------------------------------------------------------------------------------------------------------------------------|
|  | <ul style="list-style-type: none"><li>• starting from the point of view of the interlocutor (subjective reality);</li><li>• preceding the real bad news with a warning sign (e.g., “I’m afraid the situation is a bit more serious”) followed by a pause of silence to observe the other person’s reaction;</li><li>• giving the next piece of information in small doses;</li><li>• making the listener’s perception of reality gradually come closer to clinical reality;</li><li>• using non-technical language and avoiding medical jargon;</li><li>• recognizing and giving space for the expression of emotions;</li><li>• giving the opportunity to ask more questions;</li><li>• checking the degree of understanding of the information provided.</li></ul> |
|--|----------------------------------------------------------------------------------------------------------------------------------------------------------------------------------------------------------------------------------------------------------------------------------------------------------------------------------------------------------------------------------------------------------------------------------------------------------------------------------------------------------------------------------------------------------------------------------------------------------------------------------------------------------------------------------------------------------------------------------------------------------------------|
