**S3 table: Characteristics of the participants to the focus groups (n=15)**

| <b>Participants to the focus groups (n=15)</b>               | <b>N</b>    |
|--------------------------------------------------------------|-------------|
| <b>Female gender</b>                                         | 9           |
| <b>Age, years, mean (range)</b>                              | 50 (25-72)  |
| <b>Overall working experience, years, mean (range)</b>       | 24.6 (3-40) |
| <b>Experience in the current service, year, mean (range)</b> | 14.5 (3-30) |
| <b>Professional profile</b>                                  |             |
| Nurse                                                        | 6           |
| Physician                                                    | 4           |
| Social worker                                                | 2           |
| Psychologist                                                 | 1           |
| Architect                                                    | 1           |
| Bioethicist                                                  | 1           |
| <b>Job position</b>                                          |             |
| Management                                                   | 8           |
| Clinical                                                     | 6           |
| Retired                                                      | 1           |
| <b>Setting of care</b>                                       |             |
| Medicine                                                     | 3           |
| Palliative care                                              | 3           |
| Nursing home                                                 | 3           |
| Association of patients, family carers, and volunteering     | 3           |
| Supportive services*                                         | 2           |
| Emergency                                                    | 1           |

\*Continuity healthcare service (n=1), forensic medicine (n=1)
