**S6 table: Layout and design characteristics of the booklet based on the Baker Able Leaflet Design (BALD) criteria.**

| <b>Design Characteristics</b> | <b>3 Points</b>         | <b>2 Points</b> | <b>1 Point</b> | <b>0 Point</b>      |
|-------------------------------|-------------------------|-----------------|----------------|---------------------|
| Lines 50-89 mm long           |                         |                 | Yes            | No                  |
| Separation between lines      | > 2.8mm                 | 2.2-2.8mm       |                | <2.2mm              |
| Lines unjustified             |                         |                 | Yes            | No                  |
| Serif typeface                |                         | Yes             |                | No                  |
| Type size                     | 12 point                | 10-11 point     | 9 point        | < 9 point           |
| First Line indented           |                         |                 | Yes            | No                  |
| Titles lower case             |                         |                 | Yes            | No                  |
| Italics                       |                         | 0 words         | 1-3 words      | ≥ 4 words           |
| Positive advice               |                         | Positive        |                | Negative            |
| Headings standout             |                         | Yes             |                | No                  |
| Numbers all Arabic            |                         |                 | Yes            | No                  |
| Boxed text                    |                         |                 | 0-1Box         | > 1 Box             |
| Pictures                      | Words count not replace | In between      | In between     | None or Superfluors |
| Number of colors              | 4                       | 3               | 2              | 1                   |
| White space                   | >40%                    | 30-39%          | 20-29%         | <20%                |
| Paper quality                 | > 90gsm                 | 75-90gsm        |                | < 75gsm             |
| Score                         | 12                      | 8               | 5              | 0                   |
| <b>Overall score*</b>         | <b>25</b>               |                 |                |                     |

\*BALD score covers 16 attributes and ranges from 0 (worst layout and design) to 32 (best layout and design).

*Note.* Grey cells indicate the characteristics of the booklet.
